# Supplementary material for: Genetic diversity and relationships of Chinese donkeys using microsatellite markers
Source: Copernicus journal article supplement (doi:10.5194/aab-62-181-2019), 2019-04-15
Supplement: Supplementary file 1 [file aab-62-181-2019-supplement.zip]

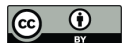

## *Supplement of*

# **Genetic diversity and relationships of Chinese donkeys using microsatellite markers**

**Lulan Zeng et al.**

*Correspondence to:* Chuzhao Lei (leichuzhao1118@126.com)

- [aab-62-181-2019-supplement-title-page.pdf](#)
- Supplement
  - [Fig S1.tif](#)
  - [Supplemental Files.xlsx](#)

The copyright of individual parts of the supplement might differ from the CC BY 4.0 License.
